# Supplementary material for: Carbon Mineralization Rates and Kinetics of Surface-Applied and Incorporated Rice and Maize Residues in Entisol and Inceptisol Soil Types
Source: MDPI journal article supplement (doi:10.3390/su13137212), 2021-06-28
Supplement: s1 [file s1]

**Table S1: Interaction effect - CO<sub>2</sub>-C fluxes (µg C/g soil/day) at various sampling intervals in soils amended with different residue treatments under two methods of placement over the period of incubation**

| Treatments            |                     |        | Period (days) |        |        |        |        |        |        |        |        |        |       |
|-----------------------|---------------------|--------|---------------|--------|--------|--------|--------|--------|--------|--------|--------|--------|-------|
|                       |                     |        | 3             | 7      | 14     | 21     | 28     | 35     | 42     | 56     | 76     | 96     | 126   |
| Residue * Soil        | Rice                | Soil-1 | 814.81        | 819.86 | 451.20 | 278.33 | 318.09 | 274.87 | 266.23 | 172.88 | 112.54 | 101.05 | 68.78 |
|                       |                     | Soil-2 | 897.51        | 658.01 | 406.26 | 299.07 | 306.85 | 288.70 | 256.72 | 171.58 | 114.36 | 101.95 | 68.78 |
|                       |                     | Soil-3 | 845.07        | 718.51 | 463.31 | 392.43 | 325.87 | 267.09 | 277.46 | 186.70 | 121.01 | 105.89 | 67.37 |
|                       |                     | Soil-4 | 943.90        | 677.67 | 402.80 | 385.51 | 306.85 | 272.28 | 248.94 | 162.93 | 107.40 | 107.10 | 77.65 |
|                       | Maize               | Soil-1 | 774.48        | 797.17 | 412.31 | 381.19 | 324.14 | 291.29 | 269.68 | 174.60 | 113.15 | 109.82 | 69.38 |
|                       |                     | Soil-2 | 732.12        | 588.42 | 412.31 | 305.13 | 325.00 | 261.04 | 254.13 | 159.91 | 111.03 | 98.93  | 78.06 |
|                       |                     | Soil-3 | 754.31        | 738.17 | 403.66 | 397.61 | 343.16 | 291.29 | 283.52 | 186.27 | 121.32 | 111.33 | 79.27 |
|                       |                     | Soil-4 | 867.25        | 783.55 | 465.90 | 350.94 | 312.04 | 263.63 | 254.99 | 163.80 | 116.17 | 101.04 | 78.06 |
| SEM (±)               |                     |        | 14.01         | 22.30  | 12.85  | 10.38  | 5.99   | 4.13   | 5.46   | 4.78   | 1.86   | 2.50   | 4.47  |
| LSD (P<0.05)          |                     |        | 40.36         | 64.23  | 37.01  | 29.91  | NS     | 11.91  | NS     | NS     | 5.35   | 7.21   | NS    |
| Application * Soil    | Incorporation       | Soil-1 | 814.81        | 825.91 | 419.22 | 336.24 | 332.78 | 289.57 | 261.91 | 172.44 | 111.33 | 105.59 | 74.43 |
|                       |                     | Soil-2 | 841.03        | 629.26 | 428.73 | 316.36 | 337.97 | 280.92 | 264.50 | 163.80 | 114.66 | 101.95 | 77.05 |
|                       |                     | Soil-3 | 814.82        | 739.69 | 425.27 | 427.87 | 345.75 | 283.51 | 291.29 | 185.84 | 118.90 | 108.91 | 74.22 |
|                       |                     | Soil-4 | 931.80        | 733.64 | 434.78 | 354.39 | 317.23 | 274.01 | 255.86 | 168.98 | 112.54 | 103.47 | 74.63 |
|                       | Surface application | Soil-1 | 774.48        | 791.12 | 444.29 | 323.27 | 309.45 | 276.60 | 274.01 | 175.04 | 114.36 | 105.28 | 63.74 |
|                       |                     | Soil-2 | 788.60        | 617.16 | 389.83 | 287.84 | 293.89 | 268.82 | 246.35 | 167.69 | 110.73 | 98.93  | 69.79 |
|                       |                     | Soil-3 | 784.56        | 717.00 | 441.70 | 362.17 | 323.28 | 274.87 | 269.68 | 187.14 | 123.43 | 108.31 | 72.41 |
|                       |                     | Soil-4 | 879.35        | 727.59 | 433.92 | 382.05 | 301.67 | 261.91 | 248.08 | 157.75 | 111.03 | 104.68 | 81.08 |
| SEM (±)               |                     |        | 14.01         | 22.30  | 12.85  | 10.38  | 5.99   | 4.13   | 5.46   | 4.78   | 1.86   | 2.50   | 4.47  |
| LSD (P<0.05)          |                     |        | NS            | NS     | NS     | 29.91  | NS     | NS     | 15.72  | NS     | NS     | NS     | NS    |
| Application * Residue | Incorporation       | Rice   | 902.55        | 708.68 | 417.49 | 351.80 | 320.25 | 281.79 | 264.93 | 175.03 | 114.21 | 104.22 | 74.63 |
|                       |                     | Maize  | 798.68        | 755.57 | 436.51 | 365.63 | 346.61 | 282.22 | 271.85 | 170.50 | 114.51 | 105.73 | 75.53 |
|                       | Surface application | Rice   | 848.09        | 728.34 | 444.29 | 325.87 | 308.58 | 269.68 | 259.74 | 172.01 | 113.45 | 103.77 | 66.66 |
|                       |                     | Maize  | 765.40        | 698.09 | 410.58 | 351.80 | 305.56 | 271.41 | 259.31 | 171.79 | 116.32 | 104.83 | 76.85 |
| SEM (±)               |                     |        | 9.91          | 15.77  | 9.09   | 7.34   | 4.23   | 2.92   | 3.86   | 3.38   | 1.31   | 1.77   | 3.16  |
| LSD (P<0.05)          |                     |        | NS            | 45.42  | 26.17  | NS     | 12.20  | NS     | NS     | NS     | NS     | NS     | NS    |

NS- Non significant at 0.05 level of significance.

**Table S2: Interaction effect - Cumulative total C mineralized ( $\mu\text{g C/g soil}$ ) at various sampling intervals in soils amended with different residue treatments under two methods of placement over the period of incubation**

| Treatments            |                     |        | Period (days) |         |         |         |         |         |         |         |         |         |         |
|-----------------------|---------------------|--------|---------------|---------|---------|---------|---------|---------|---------|---------|---------|---------|---------|
|                       |                     |        | 3             | 7       | 14      | 21      | 28      | 35      | 42      | 56      | 76      | 96      | 126     |
| Residue * Soil        | Rice                | Soil-1 | 660.00        | 1545.44 | 2398.22 | 2924.26 | 3525.45 | 4044.95 | 4548.12 | 5201.59 | 5809.31 | 6354.95 | 6912.03 |
|                       |                     | Soil-2 | 726.98        | 1437.62 | 2205.45 | 2770.69 | 3350.64 | 3896.29 | 4381.49 | 5030.05 | 5647.57 | 6198.12 | 6755.20 |
|                       |                     | Soil-3 | 684.50        | 1460.50 | 2336.14 | 3077.82 | 3693.71 | 4198.52 | 4722.92 | 5428.66 | 6082.13 | 6653.91 | 7199.56 |
|                       |                     | Soil-4 | 764.56        | 1496.44 | 2257.72 | 2986.34 | 3566.29 | 4080.89 | 4551.39 | 5167.28 | 5747.23 | 6325.54 | 6954.51 |
|                       | Maize               | Soil-1 | 627.33        | 1488.27 | 2267.53 | 2987.97 | 3600.59 | 4151.14 | 4660.84 | 5320.84 | 5931.83 | 6524.85 | 7086.83 |
|                       |                     | Soil-2 | 593.02        | 1228.52 | 2007.77 | 2584.45 | 3198.71 | 3692.08 | 4172.38 | 4776.83 | 5376.39 | 5910.59 | 6542.82 |
|                       |                     | Soil-3 | 610.99        | 1408.22 | 2171.14 | 2922.63 | 3571.19 | 4121.73 | 4657.58 | 5361.69 | 6016.78 | 6617.97 | 7260.00 |
|                       |                     | Soil-4 | 702.48        | 1548.71 | 2429.26 | 3092.53 | 3682.28 | 4180.55 | 4662.48 | 5281.63 | 5908.96 | 6454.60 | 7086.83 |
| SEM (±)               |                     |        | 11.35         | 24.76   | 37.97   | 37.93   | 39.09   | 39.88   | 40.72   | 38.36   | 41.55   | 47.56   | 61.43   |
| LSD (P<0.05)          |                     |        | 32.69         | 71.33   | 109.37  | 109.27  | 112.60  | 114.88  | 117.30  | 110.52  | 119.68  | 136.99  | 176.95  |
| Application * Soil    | Incorporation       | Soil-1 | 660.00        | 1551.98 | 2344.31 | 2979.80 | 3608.76 | 4156.04 | 4651.04 | 5302.87 | 5904.06 | 6474.21 | 7077.03 |
|                       |                     | Soil-2 | 681.24        | 1360.84 | 2171.14 | 2769.06 | 3407.82 | 3938.76 | 4438.67 | 5057.82 | 5676.98 | 6227.53 | 6851.59 |
|                       |                     | Soil-3 | 660.00        | 1458.86 | 2262.63 | 3071.29 | 3724.75 | 4260.59 | 4811.14 | 5513.62 | 6155.65 | 6743.76 | 7344.95 |
|                       |                     | Soil-4 | 754.75        | 1547.08 | 2368.81 | 3038.62 | 3638.17 | 4156.04 | 4639.60 | 5278.36 | 5886.09 | 6444.80 | 7049.26 |
|                       | Surface application | Soil-1 | 627.33        | 1481.73 | 2321.44 | 2932.43 | 3517.28 | 4040.05 | 4557.92 | 5219.56 | 5837.08 | 6405.59 | 6921.83 |
|                       |                     | Soil-2 | 638.76        | 1305.30 | 2042.08 | 2586.09 | 3141.54 | 3649.61 | 4115.20 | 4749.06 | 5346.98 | 5881.19 | 6446.44 |
|                       |                     | Soil-3 | 635.50        | 1409.85 | 2244.65 | 2929.16 | 3540.15 | 4059.66 | 4569.36 | 5276.73 | 5943.27 | 6528.12 | 7114.61 |
|                       |                     | Soil-4 | 712.28        | 1498.07 | 2318.17 | 3040.25 | 3610.40 | 4105.40 | 4574.26 | 5170.55 | 5770.10 | 6335.35 | 6992.08 |
| SEM (±)               |                     |        | 11.35         | 24.76   | 37.97   | 37.93   | 39.09   | 39.88   | 40.72   | 38.36   | 41.55   | 47.56   | 61.43   |
| LSD (P<0.05)          |                     |        | NS            | NS      | NS      | NS      | 112.60  | 114.88  | 117.30  | 110.52  | 119.68  | 136.99  | NS      |
| Application * Residue | Incorporation       | Rice   | 731.07        | 1496.43 | 2285.50 | 2950.40 | 3555.67 | 4088.24 | 4588.96 | 5250.59 | 5867.30 | 6430.10 | 7034.56 |
|                       |                     | Maize  | 646.93        | 1462.95 | 2287.95 | 2978.99 | 3634.08 | 4167.48 | 4681.26 | 5325.74 | 5944.09 | 6515.05 | 7126.86 |
|                       | Surface application | Rice   | 686.95        | 1473.56 | 2313.27 | 2929.16 | 3512.38 | 4022.08 | 4513.00 | 5163.19 | 5775.82 | 6336.16 | 6876.09 |
|                       |                     | Maize  | 619.98        | 1373.91 | 2149.90 | 2814.80 | 3392.30 | 3905.27 | 4395.37 | 5044.75 | 5672.90 | 6238.96 | 6861.39 |
| SEM (±)               |                     |        | 8.02          | 17.51   | 26.85   | 26.82   | 27.64   | 28.20   | 28.79   | 27.13   | 29.38   | 33.63   | 43.44   |
| LSD (P<0.05)          |                     |        | NS            | NS      | 77.34   | 77.27   | 79.62   | 81.23   | 82.94   | 78.15   | 84.63   | 96.87   | NS      |

NS- Non significant at 0.05 level of significance.
